1 Serum hormone levels in infertile women between conceived with and without hormone replacement  
2 therapy: Safety of estradiol and progesterone replacement therapy in frozen-thawed embryo transfer  
3 cycles for breast cancer survivors.

4

5 Ayumu Ito<sup>1,2,3,¶</sup> Yukiko Katagiri<sup>1,2,3,\*</sup> Yusuke Fukuda<sup>2,3,&</sup> Mineto Morita<sup>1,2,&</sup>

6

7 <sup>1</sup> Department of Obstetrics and Gynecology, Toho University Graduate School of Medicine, Ota-ku,  
8 Tokyo, Japan

9 <sup>2</sup> Department of Obstetrics and Gynecology, Faculty of Medicine, Toho University, Ota-ku, Tokyo,  
10 Japan

11 <sup>3</sup> Reproduction Center, Toho University Omori Medical Center, Ota-ku, Tokyo, Japan

12

13 \* Corresponding author

14 E-mail: [yukikonk@med.toho-u.ac.jp](mailto:yukikonk@med.toho-u.ac.jp)

15

16

17 <sup>¶</sup>These authors contributed equally to this work.

18 <sup>&</sup>These authors also contributed equally to this work.

19

1 **Abstract**

2 Objective

3 Recent advances in cancer treatment and reproductive medicine have made the post-treatment quality  
4 of life an important concern for cancer survivors. We aimed to evaluate the safety of sex hormone  
5 (estradiol and progesterone) replacement therapy (HRT) in women who conceived by assisted  
6 reproductive technology (ART) with hormone receptor-positive breast cancer.

7 Methods

8 We measured serum E2 and P4 levels at 4–10 weeks of gestation in women who conceived naturally  
9 or after timed intercourse or intrauterine insemination for infertility without HRT for luteal support  
10 (non-HR group; n=135). We conducted a retrospective comparison of the values from the non-HR  
11 group with those of women who conceived by ART with HRT for infertility (HR group; n=75).

12 Results

13 Serum E2 levels were significantly higher in the non-HR group than in the HR group at 5, 6, and 8  
14 weeks of gestation. Similarly, serum P4 levels were significantly higher in the non-HR group than in  
15 the HR group at 4, 5, and 6 weeks of gestation.

16 Conclusions

17 This study suggests that in cancer reproductive medicine for hormone-dependent breast cancer  
18 survivors, HRT administered during the first trimester of a pregnancy after primary disease treatment  
19 may not increase the sex hormone levels to levels above those seen in spontaneous pregnancy.

1 **Main Text**

2 **Introduction**

3 Recent advancement in cancer treatment and reproductive medicine has increased the importance  
4 of post-treatment quality of life among childhood, adolescent, and young adulthood cancer survivors.  
5 Fertility preservation is of major concern, and the use of assisted reproductive technology (ART),  
6 such as cryopreservation of embryos, oocytes, or ovarian tissue, is important for conserving fertility.  
7 For women with a history of breast cancer and other hormone-sensitive malignancies, hormone  
8 replacement therapy (HRT), which is important for continued pregnancy using ART, risks the  
9 exacerbation or recurrence of the primary disease. Hormonal exposure owing to pregnancy could be  
10 also a risk factor; however, some studies have reported that the prognosis of breast cancer survivors  
11 who underwent appropriate neoadjuvant therapy is not necessarily worsened by spontaneous  
12 pregnancy [1] [2] [3] [4] [5]. Although the rates of recurrence and mortality are lower for patients who  
13 receive multidrug chemotherapy following breast cancer surgery than for those treated by surgery  
14 alone [6], patients who receive multidrug chemotherapy show decreased fertility owing to  
15 chemotherapy-induced ovarian failure and age-associated ovarian dysfunction resulting from  
16 prolonged administration of hormone therapy. Furthermore, many patients encounter difficulty in  
17 conceiving naturally. The levels of anti-Mullerian hormone (AMH), a parameter of ovarian reserve,  
18 decrease to undetectable levels during chemotherapy and remain low even after completing of  
19 chemotherapy [7]. Studies have reported low rates of pregnancy in breast cancer survivors [8] [9]  
20 [10]; hence, before initiating treatment, patients must be provided with adequate information,

1 informed consent should be obtained, and patients should be offered consulting with a doctor  
2 specializing in reproductive medicine. Under these circumstances, the standard practice is to offer  
3 various options for preserving fertility such as cryopreservation of embryo, oocytes, or ovarian tissue  
4 to women with cancer in the limited duration between their diagnosis and treatment. However, the  
5 benefits and drawbacks of ovarian stimulation, embryo transfer, and HRT as part of ART are unclear  
6 with respect to the effect on the primary disease and are currently a subject of debate. In particular, if  
7 ovarian function decreased and ovulation is impaired after cancer treatment, HRT is essential for  
8 embryo transfer using frozen embryos or oocytes once the patient is allowed to conceive. Even after  
9 pregnancy is established, this support must be continued until the main site of hormone production  
10 switches from the corpus luteum to the placenta (the luteo-placental shift).

11 In this study, we compared the hormone levels during the first trimester of pregnancy between  
12 women who conceived naturally or after timed intercourse (TI) or intrauterine insemination (IUI),  
13 which does not require HRT for infertility, and those who conceived with ART. We aimed to  
14 evaluate the safety of estrogen and progesterone replacement therapy for frozen-thawed embryo  
15 transfer in estrogen and progestogen replacement therapy for frozen-thawed embryo transfer in  
16 women with hormone receptor-positive breast cancer who conceived using ART to compare with  
17 those who conceived naturally or after TI or IUI.

18

19

## **Materials and Methods**

20 We measured the serum E2 and P4 levels at 4–10 weeks of gestation in non-HR group participants.

1 The study subjects were women treated in the Department of Obstetrics and Gynecology or  
2 Reproduction Center, Toho University Omori Medical Center, between November 2018 and April  
3 2019, who conceived naturally or after TI or IUI for infertility. The non-HR group participants did not  
4 undergo HRT for luteal support (Fig 1). TI and IUI cycles were performed naturally or using  
5 medication for ovulation induction with follicle growth monitoring by ultrasonography (Fig 2).

6 We retrospectively compared the serum E2 and P4 levels at 4–10 weeks of gestation between the  
7 non-HR and HR groups. The HR group included women who conceived after frozen-thawed embryo  
8 transfer and HRT with estrogen and progesterone in our reproduction center between January and  
9 December 2018 (Fig 1). The members of both groups continued their pregnancies until at least 12  
10 weeks of gestation.

11 Estrogen replacement therapy was administered in the form of transdermal estrogen patch applied  
12 every alternate day from day 3 of menstruation. The initial dose was 2.16 mg, and this was increased  
13 after a few days to 2.88 mg and then to 3.60 mg. Transvaginal natural progesterone at a dose of 90–800  
14 mg/day was administered when the thickness of the endometrium was  $\geq 8$  mm; depending on the stage  
15 of the frozen embryo to be transferred, the embryo transfer was performed on day 2 (P+2), day 3 (P+3),  
16 or day 5 (P+5) after the first day of administration of transvaginal natural progesterone use (P0). The  
17 serum hCG level was measured at 4w0d of gestation counted from the date of transfer. If the result was  
18 positive, HR was continued, and pregnancy was confirmed when the gestational sac was visible. The  
19 serum E2 and P4 levels were subsequently measured, and the administration of transdermal estrogen  
20 and transvaginal natural progesterone was continued until adequate endogenous hormone secretion was

1 confirmed (Fig 3).

2 SPSS Statistics ver. 25 (SPSS Inc., Chicago, IL, USA) was used for statistical analysis.

### 3 **Ethics declarations**

4 The protocol of the study was approved by the Ethics Committee of Toho University Omori Medical  
5 Center (Approval No. M1704717209 and M18239) and conformed with the 1964 guidelines of the  
6 Helsinki Declaration and its later amendments. Informed consent was obtained from all patients. We  
7 obtained written informed consent was obtained from the patients of non-HR group and informed  
8 consent in the form of opt-out on the website from the patients of HR group. Information on the research  
9 was made public on the website of each institution, and the opportunity for the research subjects to  
10 refuse participation was guaranteed.

11

12

## Results

13 The study population included 135 women who conceived naturally without the use of HRT (non-  
14 HR group; of these, 100 had conceived naturally and 35 had conceived after IUI) and 75 who  
15 conceived after frozen-thawed embryo transfer and HRT with estrogen and progesterone in our  
16 Reproduction Center between January and December 2018 (HR group). There was no significant  
17 difference in the patient age between the two groups ( $33.4 \pm 5.0$  years vs.  $35.3 \pm 4.2$  years, non-HR  
18 group vs. HR group).

19 The serum E2 and P4 levels in the non-HR and HR groups increased over time during the first  
20 trimester of pregnancy (Figs 4a, 4b, 5a, and 5b). There was no significant difference in the pregnancy

1 continuation rate between the two groups. The formulas for the approximate curves of the serum E2  
 2 and P4 levels for the non-HR group are  $y=234x+500$  ( $R^2=0.17$ ) and  $y=0.8x+23.3$  ( $R^2=0.027$ ) and  
 3 those for the HR group are  $y=258x-112$  ( $R^2=0.63$ ) and  $y=2.5x+9.3$  ( $R^2=0.27$ ).

4 The serum E2 values in the non-HR and HR groups were  $453.8\pm137.7$  and  $291.9\pm200.7$  pg/mL at  
 5 4 weeks,  $622.3\pm379.7$  and  $351.3\pm173.0$  pg/mL at 5 weeks,  $870.1\pm326.7$  and  $644.1\pm262.3$  pg/mL at 6  
 6 weeks,  $2056.3\pm1635.0$  and  $976.6\pm342.2$  pg/mL at 7 weeks,  $3232.0\pm1781.3$  and  $1285.7\pm453.4$  pg/mL  
 7 at 8 weeks,  $1589.3\pm660.9$  and  $1556.3\pm587.9$  pg/mL at 9 weeks, and  $81790.9\pm974.6$  and  $1781\pm649.2$   
 8 pg/mL at 10 weeks of gestation, respectively. The serum E2 level was significantly higher in the non-  
 9 HR group than in the HR group at 5, 6, and 8 weeks of gestation (5 weeks,  $p<0.05$ ; 6 weeks,  $p<0.01$ ;  
 10 8 weeks,  $p<0.01$ ). There was no significant difference in the levels at 4, 7, 9, or 10 weeks of gestation  
 11 between the groups (Table 1).

12

13 Table1 Serum E2 levels over time in the non-HR and HR groups

|          | non-HR group (n)       | HR group (n)          | P value   |
|----------|------------------------|-----------------------|-----------|
| 4 weeks  | $453.8\pm137.7$ (5)    | $291.9\pm200.7$ (75)  | <i>NS</i> |
| 5 weeks  | $622.3\pm379.7$ (15)   | $351.3\pm173.0$ (75)  | $<0.05$   |
| 6 weeks  | $870.1\pm326.7$ (12)   | $644.1\pm262.3$ (74)  | $<0.01$   |
| 7 weeks  | $2056.3\pm1635.0$ (3)  | $976.6\pm342.2$ (73)  | $<0.01$   |
| 8 weeks  | $3232.0\pm1781.3$ (10) | $1285.7\pm453.4$ (71) | $<0.01$   |
| 9 weeks  | $1589.3\pm660.9$ (32)  | $1556.3\pm587.9$ (62) | <i>NS</i> |
| 10 weeks | $1790.9\pm974.6$ (42)  | $1781\pm649.2$ (36)   | <i>NS</i> |

Data are expressed as mean  $\pm$  SD, NS; not significant, unit: pg/mL

14

1 The serum P4 values in the non-HR and HR groups were 23.9±5.1 and 14.0±7.8 ng/mL at 4 weeks,  
2 25.8±12.7 and 14.7±8.6 ng/mL at 5 weeks, 22.7±326.7 and 15.4±7.5 ng/mL at 6 weeks, 28.9±18.0  
3 and 18.8±7.6 ng/mL at 7 weeks, 30.9±14.1 and 22.4±7.4 ng/mL at 8 weeks, 25.8±7.2 and 26.9±8.9  
4 ng/mL at 9 weeks, and 28.5±8.8 and 27.6±9.3 ng/mL at 10 weeks of gestation, respectively. The  
5 serum P4 level was significantly higher in the non-HR group than in the HR group at 4, 5, and 6  
6 weeks of gestation (4 weeks,  $p < 0.01$ ; 5 weeks,  $p < 0.01$ ; 6 weeks,  $p < 0.01$ ). There was no significant  
7 difference in the levels at 7, 8, 9, or 10 weeks of gestation between the groups (Table 2).

8

9 Table 2 Serum P4 levels over time in the non-HR and HR groups

|          | non-HR group (n) | HR group (n)  | P value |
|----------|------------------|---------------|---------|
| 4 weeks  | 23.9±5.1 (5)     | 14.0±7.8 (75) | <0.01   |
| 5 weeks  | 25.8±12.7 (15)   | 14.7±8.6 (75) | <0.01   |
| 6 weeks  | 22.7±326.7 (12)  | 15.4±7.5 (74) | <0.01   |
| 7 weeks  | 28.9±18.0 (3)    | 18.8±7.6 (73) | NS      |
| 8 weeks  | 30.9±14.1 (10)   | 22.4±7.4 (71) | NS      |
| 9 weeks  | 25.8±7.2 (32)    | 26.9±8.9 (62) | NS      |
| 10 weeks | 28.5±8.8 (42)    | 27.6±9.3 (36) | NS      |

Data are expressed as mean ± SD, NS; not significant, unit: ng/mL

10

11

## Discussion

12

13

14

Although some studies have reported that the use of ART in breast cancer survivors does not significantly affect the prognosis of cancer [11] [12] [13] [14] [15], the number of such studies is small, and the safety of ART has not been established to date. Previous reports have indicated that if women



1 without breast cancer receive more than six sessions of controlled ovarian stimulation (COS) under  
2 ART, the standardized incidence rate of breast cancer increases 1.23-times [16]. Exposure to estrogen  
3 causes dose-dependent cellular proliferation and an increase in cancer cell lines estrogen receptor [17].  
4 Hence, careful consideration is necessary before offering this option to patients with cancer. As serum  
5 estrogen levels increase with COS, the risk of recurrence is of particular concern in patients with  
6 hormone receptor-positive breast cancer[18].

7 Estrogen and its metabolites have been implicated in the onset and progression of breast cancer  
8 [19]. Recently, COS using gonadotropin-releasing hormone (GnRH) antagonists and aromatase  
9 inhibitors was reported to be effective for minimizing any increase in the serum E2 levels [20][21].  
10 However, when aromatase inhibitors are used for COS, the serum P4 level is maintained at a  
11 comparatively high level [22]. The use of a GnRH agonist rather than of hCG as the trigger may be  
12 effective for minimizing the increase in the estrogen and progesterone levels [23] [24] [25].  
13 Conventionally, progesterone levels do not affect the risk of breast cancer [26], although some studies  
14 have reported that progesterone levels may contribute toward breast cancer risk [27] [28]. Therefore, a  
15 method in which the serum E2 and P4 levels do not increase above the required levels must be  
16 selected when using ART for breast cancer survivors.

17 In ART, HRT is important for creating the structural and functional environment for embryo  
18 implantation in the endometrium and is an established treatment with proven efficacy [29]. With respect  
19 to the hormones administered, progesterone and a combination of progesterone and estrogen have been  
20 reported to be effective [29] [30]. In a fresh embryo transfer, the GnRH agonist used for COS as a short

1 or long protocol and the GnRH antagonist used for pituitary suppression prevent adequate corpus  
2 luteum formation, causing luteal function failure [31] [32]. This indicates that HRT with estrogen and  
3 progesterone is required for both implantation and continuation of the pregnancy. In a frozen-thawed  
4 embryo transfer and during HRT, ovulation does not occur; thus, corpus luteum is not formed and  
5 progesterone is not secreted endogenously. If the corpus luteum is removed before 7 weeks of gestation,  
6 the serum P4 level suddenly decreases and miscarriage may occur [33]. Thus, luteal support is  
7 necessary until at least 7 weeks of gestation. During the natural cycle, luteal support is not necessarily  
8 required; however, it is needed if there are luteal phase defects. Many women with decreased ovarian  
9 function after neoadjuvant chemotherapy for breast cancer who do not have an ovulatory cycle and  
10 whose fertility has declined are likely to require HRT, including the administration of estrogen and  
11 progesterone. This plays a major role in embryo implantation and the continuation of pregnancy.

12 Similar to COS, estrogen and progesterone replacement therapies are administered to patients  
13 without an ovulatory cycle who are undergoing thawed embryo transfer. The effect of these therapies  
14 on breast cancer is concerning. Currently, the safety of these replacements is not known. In this study,  
15 we measured the levels of serum E2 and P4 levels in the first trimester of pregnancy in patients who  
16 did not receive HRT.

17 Our results suggest that in the first trimester, the serum E2 and P4 levels in the HR group were not  
18 higher than those in the non-HR group. Thus, the amount of HRT required to establish a pregnancy  
19 may not increase the cancer risk associated with hormonal exposure in patients with hormone receptor-  
20 positive breast cancer compared to that in those with spontaneous pregnancy.

1 We found that the serum E2 levels were significantly lower in the HR group than in the non-HR group  
2 at 5, 6, and 8 weeks of gestation. Differences at 4 and 7 weeks of gestation may not have been  
3 statistically significant owing to the small sample size. In the non-HR group, the levels tended to  
4 increase over time (Table 1). At approximately 6–7 weeks of gestation, the main site of hormone  
5 production switches from the corpus luteum to the placenta (luteo-placental shift) [34], and the levels  
6 rapidly increased during this period (Fig 4a). There was no significant difference in the serum E2 levels  
7 at 9 and 10 weeks of gestation between the two groups; this may be because estrogen replacement  
8 therapy was discontinued in the HR group at 8 weeks of gestation, and in both groups, the main site of  
9 hormone production was now the placenta.

10 The serum P4 levels were significantly lower in the HR group than in the non-HR group at 4, 5, and  
11 6 weeks of gestation (Table 2). In the non-HR group, the serum P4 levels gradually increased between  
12 4 and 10 weeks of gestation to 20–30 ng/mL (Fig 4b), and in the HR group, the level remained at  
13 approximately 15 ng/ml, which was significantly lower than that in the non-HR group. As these  
14 pregnancies were achieved by embryo transfer and HRT with estrogen and progesterone, without the  
15 formation of the corpus luteum, the serum P4 levels would have been solely derived from the  
16 transvaginal natural progesterone administered. Although the use of transvaginal natural progesterone  
17 results in significantly lower serum P4 levels than those achieved after intramuscular injection of natural  
18 luteal hormone, the P4 concentration in the endometrial tissue is significantly higher; hence, the serum  
19 P4 level does not reflect the local concentration in the tissue [35] [36]. In practice, the serum P4 levels  
20 are reported to be low after the administration of transvaginal natural progesterone, but the P4

1 concentration in the endometrial tissue is maintained at a higher level [37]. In this study, because few  
2 samples were collected from patients in the non-HR group at 7 weeks of gestation, we could not  
3 evaluate this aspect. However, as the placenta started to produce hormones by approximately 6–7  
4 weeks of gestation, the hormone levels increased after 8 weeks of gestation in the HR group, and the  
5 significant difference between the groups disappeared.

6 Our results suggest that increased serum E2 and P4 levels in the first trimester of pregnancy owing  
7 to HRT are lower than the serum E2 and P4 levels noted during the first trimester of spontaneous  
8 pregnancy or pregnancy following regular infertility treatment. This suggests that the risk of breast  
9 cancer associated with thawed embryo transfer with HRT of estrogen and progesterone may not be  
10 greater than that associated with spontaneous pregnancy.

11 This study has several limitations. First, only a few samples were collected from the patients in the  
12 non-HR group. Therefore, we contained patients undergoing medication for ovulation induction in non-  
13 HR group. This was unavoidable because the study design involved the use of left-over blood from  
14 blood drawn during scheduled hospital visits by women who conceived naturally or after IUI. Second,  
15 because this study did not include breast cancer survivors, we were unable to assess the prognosis or  
16 risk of recurrence in breast cancer survivors who underwent thawed embryo transfer with HRT of  
17 estrogen and progesterone. It is an ethical dilemma not to offer HR to breast cancer survivors when they  
18 have a rare opportunity to conceive using ART. Hence, we opted for a study design in which we  
19 compared the non-HR and HR groups.

20 In conclusion, our results showed that thawed embryo transfer with HRT did not increase the serum

1 hormone levels beyond those observed in spontaneous pregnancy. This suggests that in patients with  
2 hormone receptor-positive breast cancer, HRT administered during the first trimester of a pregnancy,  
3 established as a result of ART, after treatment of the primary disease may not increase the sex hormones  
4 levels beyond those observed in spontaneous pregnancy.

5

## 6 **Acknowledgements**

7 The authors would like to thank to all colleague of the Department of Obstetrics and Gynecology,  
8 Reproduction Center, Department of Laboratory Medicine, Toho University Omori Medical Center  
9 for the cooperation of the subjects' recruitment and measuring blood samples.

10

## 11 **References:**

- 12 1. Kroman N, Jensen MB, Wohlfahrt J, Ejlersen B. Pregnancy after treatment of breast cancer -  
13 A population-based study on behalf of Danish Breast Cancer Cooperative Group. *Acta Oncol*  
14 (Madr). 2008;47: 545–549. doi:10.1080/02841860801935491
- 15 2. Rosenberg L, Thalib L, Adami HO, Hall P. Childbirth and breast cancer prognosis. *Int J*  
16 *Cancer*. 2004;111: 772–776. doi:10.1002/ijc.20323
- 17 3. Azim HA, Kroman N, Paesmans M, Gelber S, Rotmensz N, Ameye L, et al. Prognostic  
18 impact of pregnancy after breast cancer according to estrogen receptor status: A multicenter  
19 retrospective study. *J Clin Oncol*. 2013;31: 73–79. doi:10.1200/JCO.2012.44.2285
- 20 4. Lambertini M, Kroman N, Ameye L, Cordoba O, Pinto A, Benedetti G, et al. Long-term

- 1 safety of pregnancy following breast cancer according to estrogen receptor status. *J Natl*  
2 *Cancer Inst.* 2018;110: 426–429. doi:10.1093/jnci/djx206
- 3 5. Lambertini M, Ameye L, Hamy A-S, Zingarello A. Pregnancy After Breast Cancer in Patients  
4 With Germline BRCA Mutations. *J Clin Oncol.* 2020;10: 3012–3023.  
5 doi:10.1200/JCO.19.02399.
- 6 6. Breast Cancer Trialists E, Group C. Articles Comparisons between different  
7 polychemotherapy regimens for early breast cancer: meta-analyses of long-term outcome  
8 among 100 000 women in 123 randomised trials. *Lancet.* 2012;379: 432–444.  
9 doi:10.1016/S0140
- 10 7. Fréour T, Barrière P, Masson D. Anti-müllerian hormone levels and evolution in women of  
11 reproductive age with breast cancer treated with chemotherapy. *Eur J Cancer.* 2017;74: 1–8.  
12 doi:10.1016/j.ejca.2016.12.008
- 13 8. Mueller BA, Simon MS, Deapen D, Kamineni A, Malone KE, Daling JR. Childbearing and  
14 survival after breast carcinoma in young women. *Cancer.* 2003;98: 1131–1140.  
15 doi:10.1002/cncr.11634
- 16 9. Anderson RA, Brewster DH, Wood R, Nowell S, Fischbacher C, Kelsey TW, et al. The  
17 impact of cancer on subsequent chance of pregnancy: A populationbased analysis. *Hum*  
18 *Reprod.* 2018;33: 1281–1290. doi:10.1093/humrep/dey216
- 19 10. Stensheim H, Cvancarova M, Møller B, Fosså SD. Pregnancy after adolescent and adult  
20 cancer: A population-based matched cohort study. *Int J Cancer.* 2011;129: 1225–1236.

- 1           doi:10.1002/ijc.26045
- 2   11.   Goldrat O, Kroman N, Peccatori FA, Cordoba O, Pistilli B, Lidegaard O, et al. Pregnancy  
3           following breast cancer using assisted reproduction and its effect on long-term outcome. *Eur J*  
4           *Cancer*. 2015;51: 1490–1496. doi:10.1016/j.ejca.2015.05.007
- 5   12.   Muñoz E, Domingo J, De Castro G, Lorenzo I, García-Velasco JA, Bellver J, et al. Ovarian  
6           stimulation for oocyte vitrification does not modify disease-free survival and overall survival  
7           rates in patients with early breast cancer. *Reprod Biomed Online*. 2019;39: 860–867.  
8           doi:10.1016/j.rbmo.2019.07.003
- 9   13.   Sergentanis TN, Diamantaras AA, Perlepe C, Kanavidis P, Skalkidou A, Petridou ET. IVF  
10           and breast cancer: A systematic review and meta-analysis. *Hum Reprod Update*. 2014;20:  
11           106–123. doi:10.1093/humupd/dmt034
- 12   14.   Pfeifer S, Butts S, Dumesic D, Fossum G, Gracia C, La Barbera A, et al. Fertility drugs and  
13           cancer: a guideline. *Fertil Steril*. 2016;106: 1617–1626. doi:10.1016/j.fertnstert.2016.08.035
- 14   15.   Rosenberg E, Fredriksson A, Einbeigi Z, Bergh C, Strandell A. No increased risk of relapse of  
15           breast cancer for women who give birth after assisted conception. *Hum Reprod Open*.  
16           2019;2019: hoz039-undefined. doi:10.1093/hropen/hoz039
- 17   16.   Venn A, Watson L, Bruinsma F, Giles G, Healy D. Risk of cancer after use of fertility drugs  
18           with in-vitro fertilisation. *Lancet*. 1999;354: 1586–1590. doi:10.1016/S0140-6736(99)05203-  
19           4
- 20   17.   Cooley A, Matthews L, Zelivianski S, Hardy A, Jeruss JS. Effect of infertility treatment and

- 1 pregnancy-related hormones on breast cell proliferation in vitro. *Hum Reprod.* 2012;27: 146–  
2 152. doi:10.1093/humrep/der378
- 3 18. Muñoz E, González N, Muñoz L, Aguilar J, García Velasco JA. Ovarian stimulation in  
4 patients with breast cancer. *Ecancermedicalsecience.* 2015;9: 504-undefined.  
5 doi:10.3332/ecancer.2015.504
- 6 19. Clemons M, Goss P. Estrogen and the risk of breast cancer. *N Engl J Med.* 2001;344: 276–  
7 285. doi:10.1056/NEJM200101253440407
- 8 20. Cakmak H, Katz A, Cedars MI, Rosen MP. Effective method for emergency fertility  
9 preservation: Random-start controlled ovarian stimulation. *Fertil Steril.* 2013;100: 1673–1680.  
10 doi:10.1016/j.fertnstert.2013.07.1992
- 11 21. Oktay K, Hourvitz A, Sahin G, Oktem O, Safro B, Cil A, et al. Letrozole reduces estrogen and  
12 gonadotropin exposure in women with breast cancer undergoing ovarian stimulation before  
13 chemotherapy. *J Clin Endocrinol Metab.* 2006;91: 3885–3890. doi:10.1210/jc.2006-0962
- 14 22. Goldrat O, Gervy C, Englert Y, Delbaere A, Demeestere I. Progesterone levels in letrozole  
15 associated controlled ovarian stimulation for fertility preservation in breast cancer patients.  
16 *Hum Reprod.* 2015;30: 2184–2189. doi:10.1093/humrep/dev155
- 17 23. Oktay K, Türkçüoğlu I, Rodriguez-Wallberg KA. GnRH agonist trigger for women with  
18 breast cancer undergoing fertility preservation by aromatase inhibitor/FSH stimulation.  
19 *Reprod Biomed Online.* 2010. doi:10.1016/j.rbmo.2010.03.004
- 20 24. Gonen Y, Balakier H, Powell W, Casper RF. Use of gonadotropin-releasing hormone agonist



- 1 to trigger follicular maturation for in vitro fertilization. *J Clin Endocrinol Metab.* 1990;71:  
2 918–922. doi:10.1210/jcem-71-4-918
- 3 25. The Eshre Guideline Group On Ovarian Stimulation, Bosch E, Broer S, Griesinger G,  
4 Grynberg M, Humaidan P, et al. ESHRE guideline: ovarian stimulation for IVF/ICSI. *Hum*  
5 *Reprod Open.* 2020;2020. doi:10.1093/hropen/hoaa009
- 6 26. Samson M, Porter N, Orekoya O, Hebert JR, Adams SA, Bennett CL, et al. Progestin and  
7 breast cancer risk: a systematic review. *Breast Cancer Res Treat.* 2016;155: 3–12.  
8 doi:10.1007/s10549-015-3663-1
- 9 27. Hilton HN, Santucci N, Silvestri A, Kantimm S, Huschtscha LI, Graham JD, et al.  
10 Progesterone stimulates progenitor cells in normal human breast and breast cancer cells.  
11 *Breast Cancer Res Treat.* 2014;143: 423–433. doi:10.1007/s10549-013-2817-2
- 12 28. Briskin C. Progesterone signalling in breast cancer: A neglected hormone coming into the  
13 limelight. *Nat Rev Cancer.* 2013;13: 385–396. doi:10.1038/nrc3518
- 14 29. van der Linden M, Buckingham K, Farquhar C, Kremer JAM, Metwally M. Luteal phase  
15 support for assisted reproduction cycles. *Cochrane Database Syst Rev.* 2015;2015.  
16 doi:10.1002/14651858.CD009154.pub3
- 17 30. Zhang XM, Lv F, Wang P, Huang XM, Liu KF, Pan Y, et al. Estrogen supplementation to  
18 progesterone as luteal phase support in patients undergoing in vitro fertilization. *Med (United*  
19 *States).* 2015;94: e459. doi:10.1097/MD.0000000000000459
- 20 31. Beckers NGM, Macklon NS, Eijkemans MJ, Ludwig M, Felberbaum RE, Diedrich K, et al.

- 1 Nonsupplemented luteal phase characteristics after the administration of recombinant human  
2 chorionic gonadotropin, recombinant luteinizing hormone, or gonadotropin-releasing  
3 hormone (GnRH) agonist to induce final oocyte maturation in in vitro fertilization patients  
4 after ovarian stimulation with recombinant follicle-stimulating hormone and gnrh antagonist  
5 cotreatment. *J Clin Endocrinol Metab.* 2003;88: 4186–4192. doi:10.1210/jc.2002-021953
- 6 32. Stovall D., Van Voorhis B., Sparks AE., Adams L., Syrop C. Selective early elimination of  
7 luteal support in assisted reproduction cycles using a gonadotropin-releasing hormone agonist  
8 during ovarian stimulation. *Fertil Steril.* 2004;68: S207–S208. doi:10.1016/s0015-  
9 0282(97)91055-4
- 10 33. Csapo AI, Pulkkinen MO, Ruttner B, Sauvage JP, Wiest WG. The significance of the human  
11 corpus luteum in pregnancy maintenance. *Am J Obs Gynecol.* 1972;112: 1061–1067.  
12 doi:10.1016/0002-9378(72)90181-0
- 13 34. Tal R, Taylor HS, Burney RO, Mooney SB, Giudice LC. Endocrinology of Pregnancy. In:  
14 Feingold KR., editor. *Endotext.* 2015. pp. 16–25. Available: <https://www.endotext.org>
- 15 35. Paulson RJ, Collins MG, Yankov VI. Progesterone pharmacokinetics and pharmacodynamics  
16 with 3 dosages and 2 regimens of an effervescent micronized progesterone vaginal insert. *J*  
17 *Clin Endocrinol Metab.* 2014;99: 4241–4249. doi:10.1210/jc.2013-3937
- 18 36. Miles RA, Paulson RJ, Lobo RA, Press MF, Dahmouch L, Sauer M V. Pharmacokinetics and  
19 endometrial tissue levels of progesterone after administration by intramuscular and vaginal  
20 routes- a comparative study. *Fertil Steril.* 1994;62: 485–490. doi:10.1016/0002-

1 9378(72)90181-0

2 37. Matteo Lambertini, Lieveke Ameye, Anne-Sophie Hamy, Anna Zingarello. High local

3 endometrial effect of vaginal progesterone gel. *J Clin Oncol.* 2020;38: 3012–3023.

4 doi:10.1200/JCO.19.02399

5

6 **Figure caption**

7 Fig 1 Medical treatment schedules of non-HR group and HR-group

8

9 Fig 2 Flowchart of fertility treatment

10

11 Fig 3 Basic protocol for frozen-thawed embryo transfer in a hormone-induced ovulatory cycle and

12 luteal support

13 Estrogen replacement therapy was administered in the form of transdermal estrogen patch applied every

14 alternate day from Day 3 of menstruation. Transvaginal natural progesterone was administered when

15 the thickness of the endometrium was  $\geq 8$  mm; depending on the stage of the frozen embryo to be

16 transferred, the embryo transfer was performed.

17

18 Fig 4 Serum hormone levels in the non-HR group

19 (a) Serum E2 levels during the first trimester in the non-HR group. (b) Serum P4 levels during the first

20 trimester in the non-HR group.

21

22 Fig 5 Serum hormone levels in the HR group

23 (a) Serum E2 levels during the first trimester in the HR group. (b) Serum P4 levels during the first

24 trimester in the HR group.

1

2

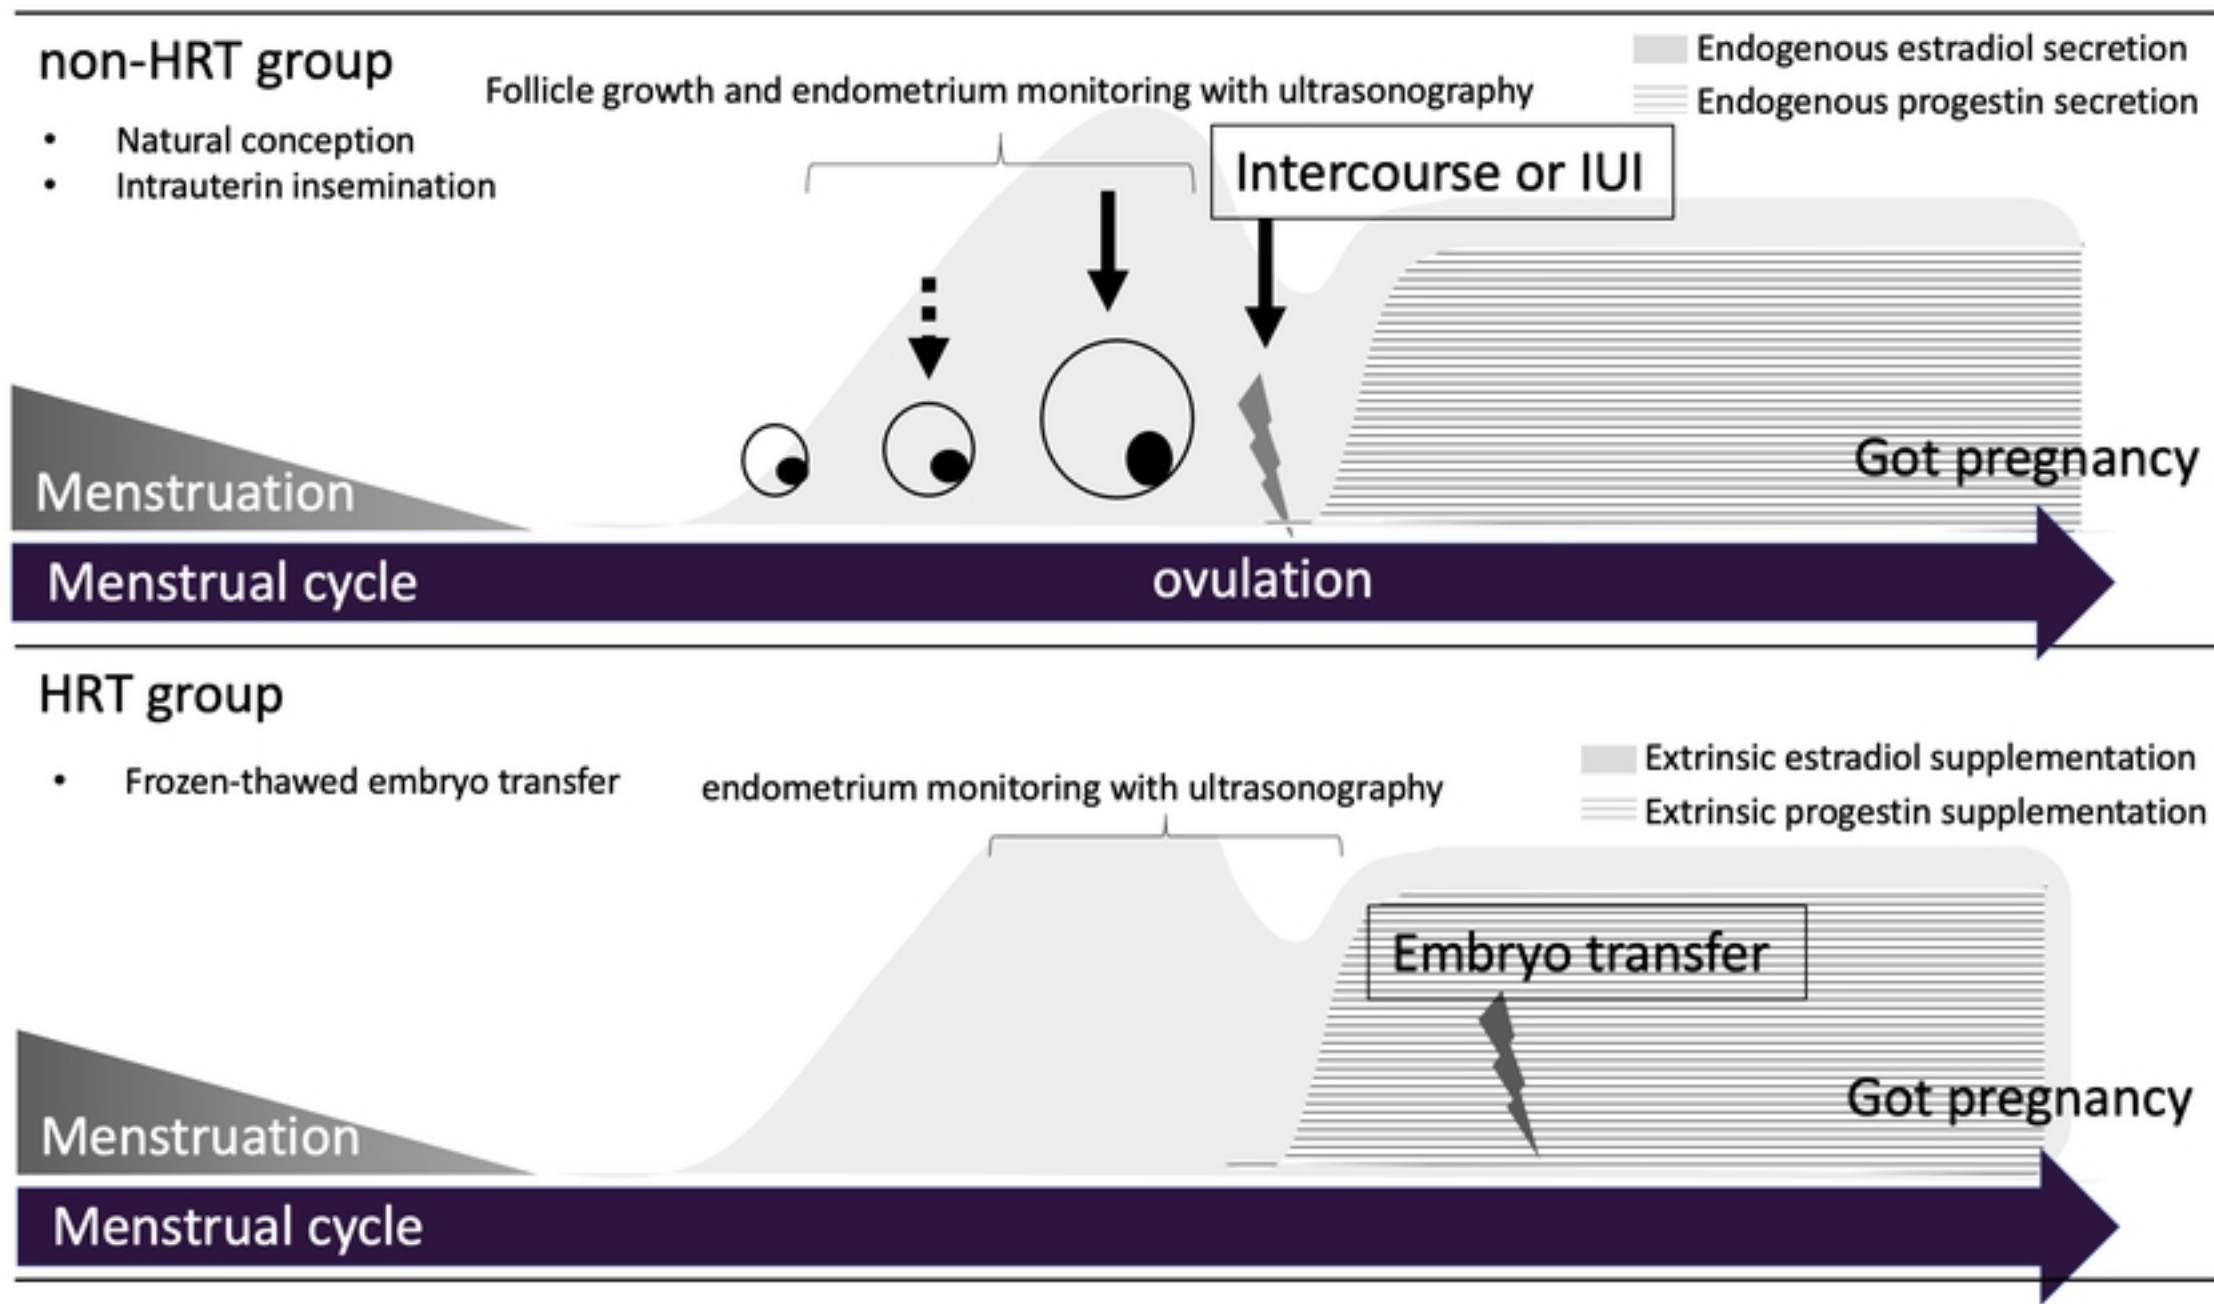

Figure 1

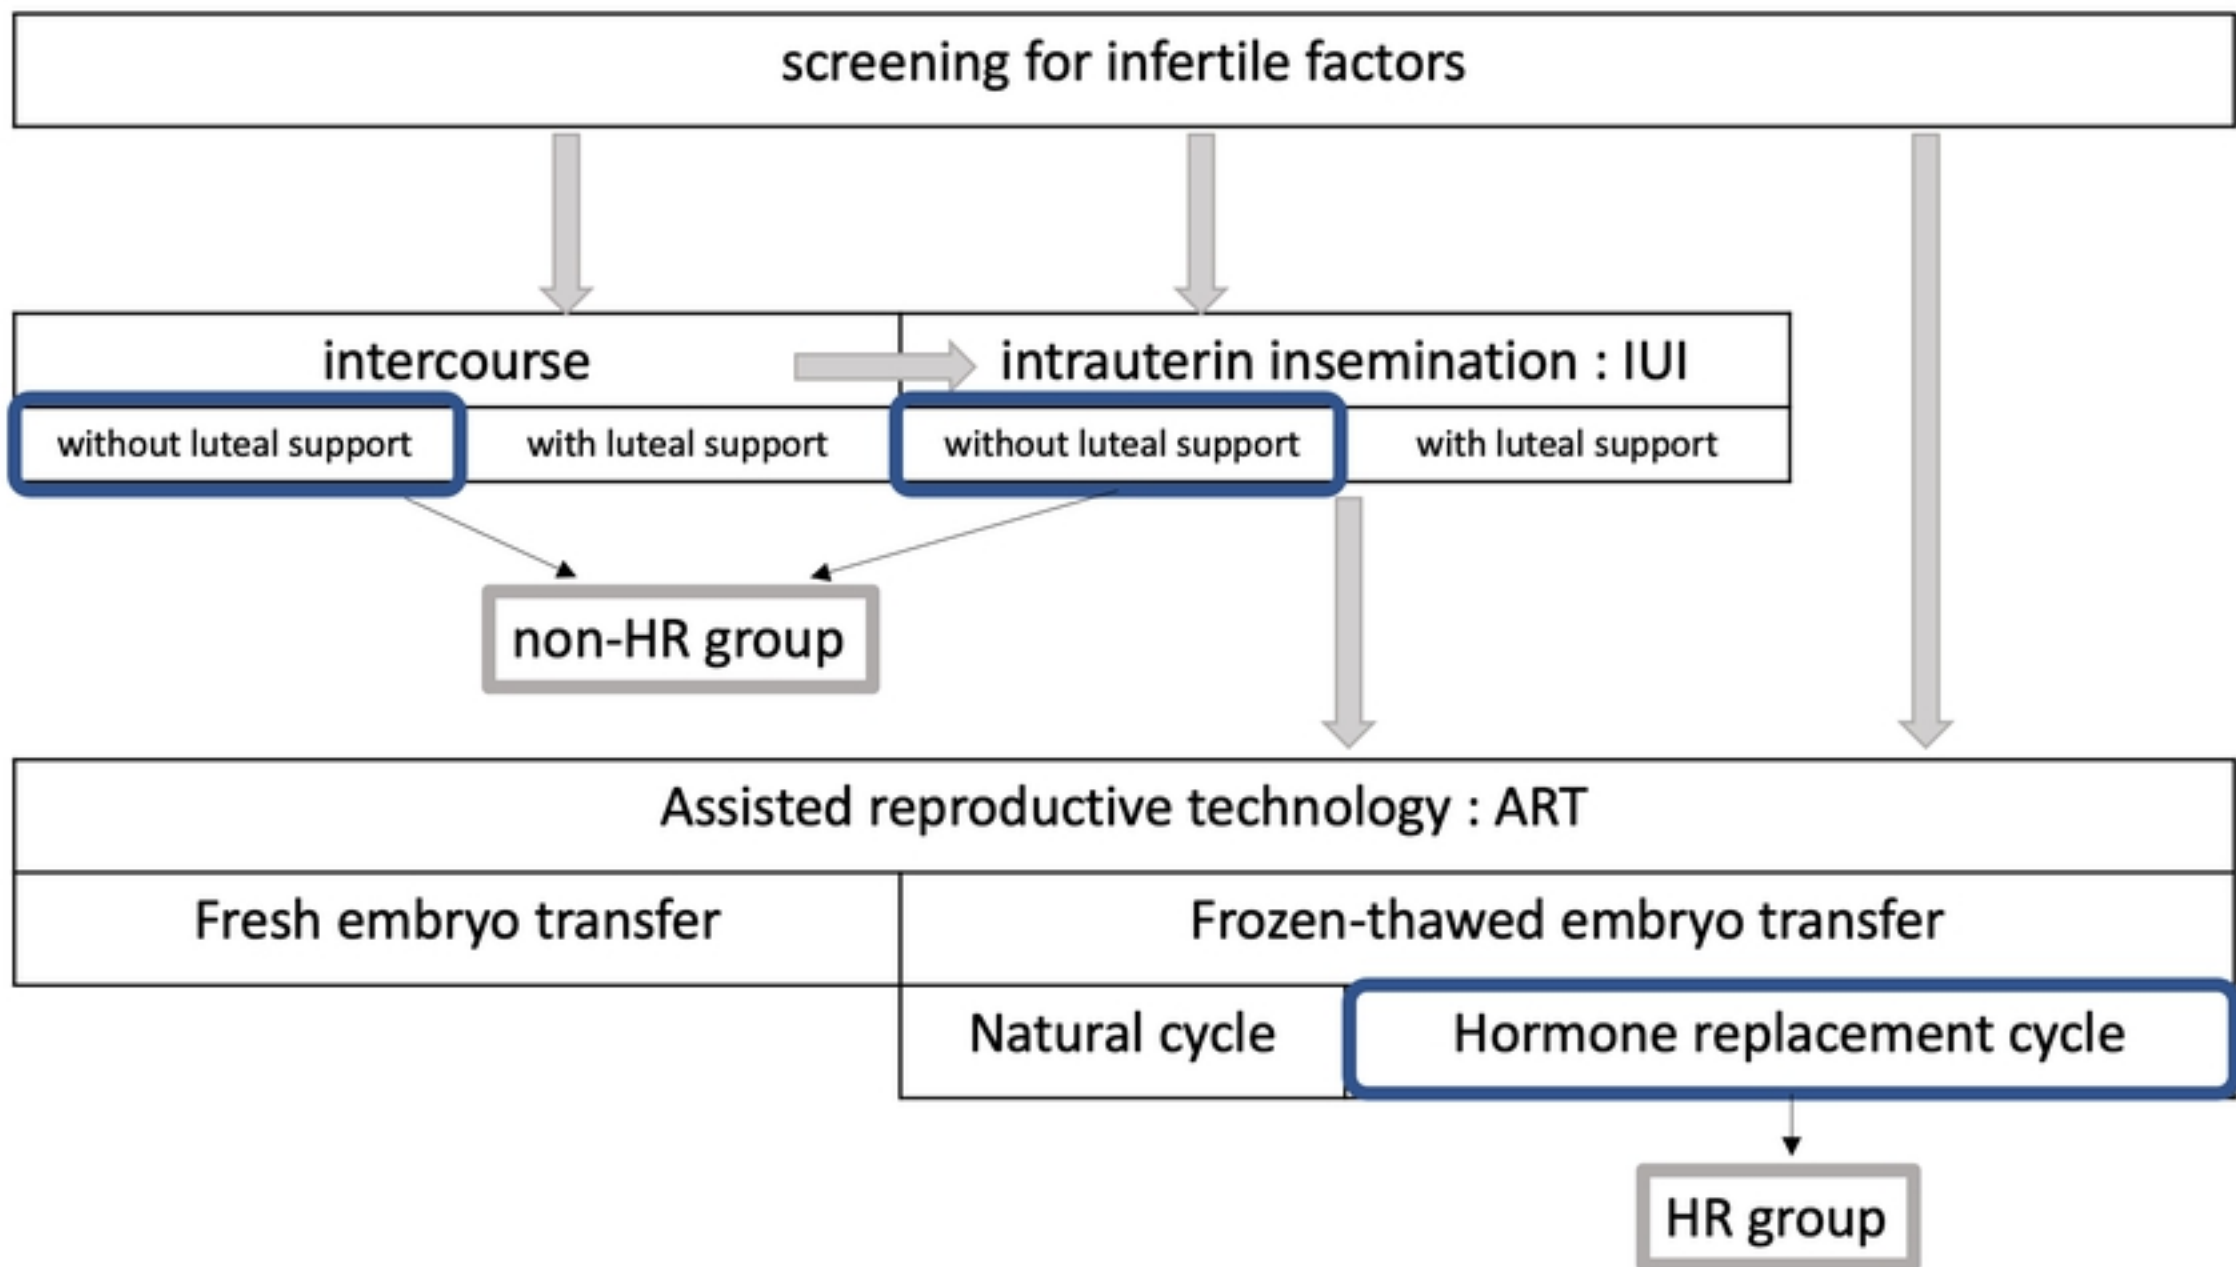

Figure2

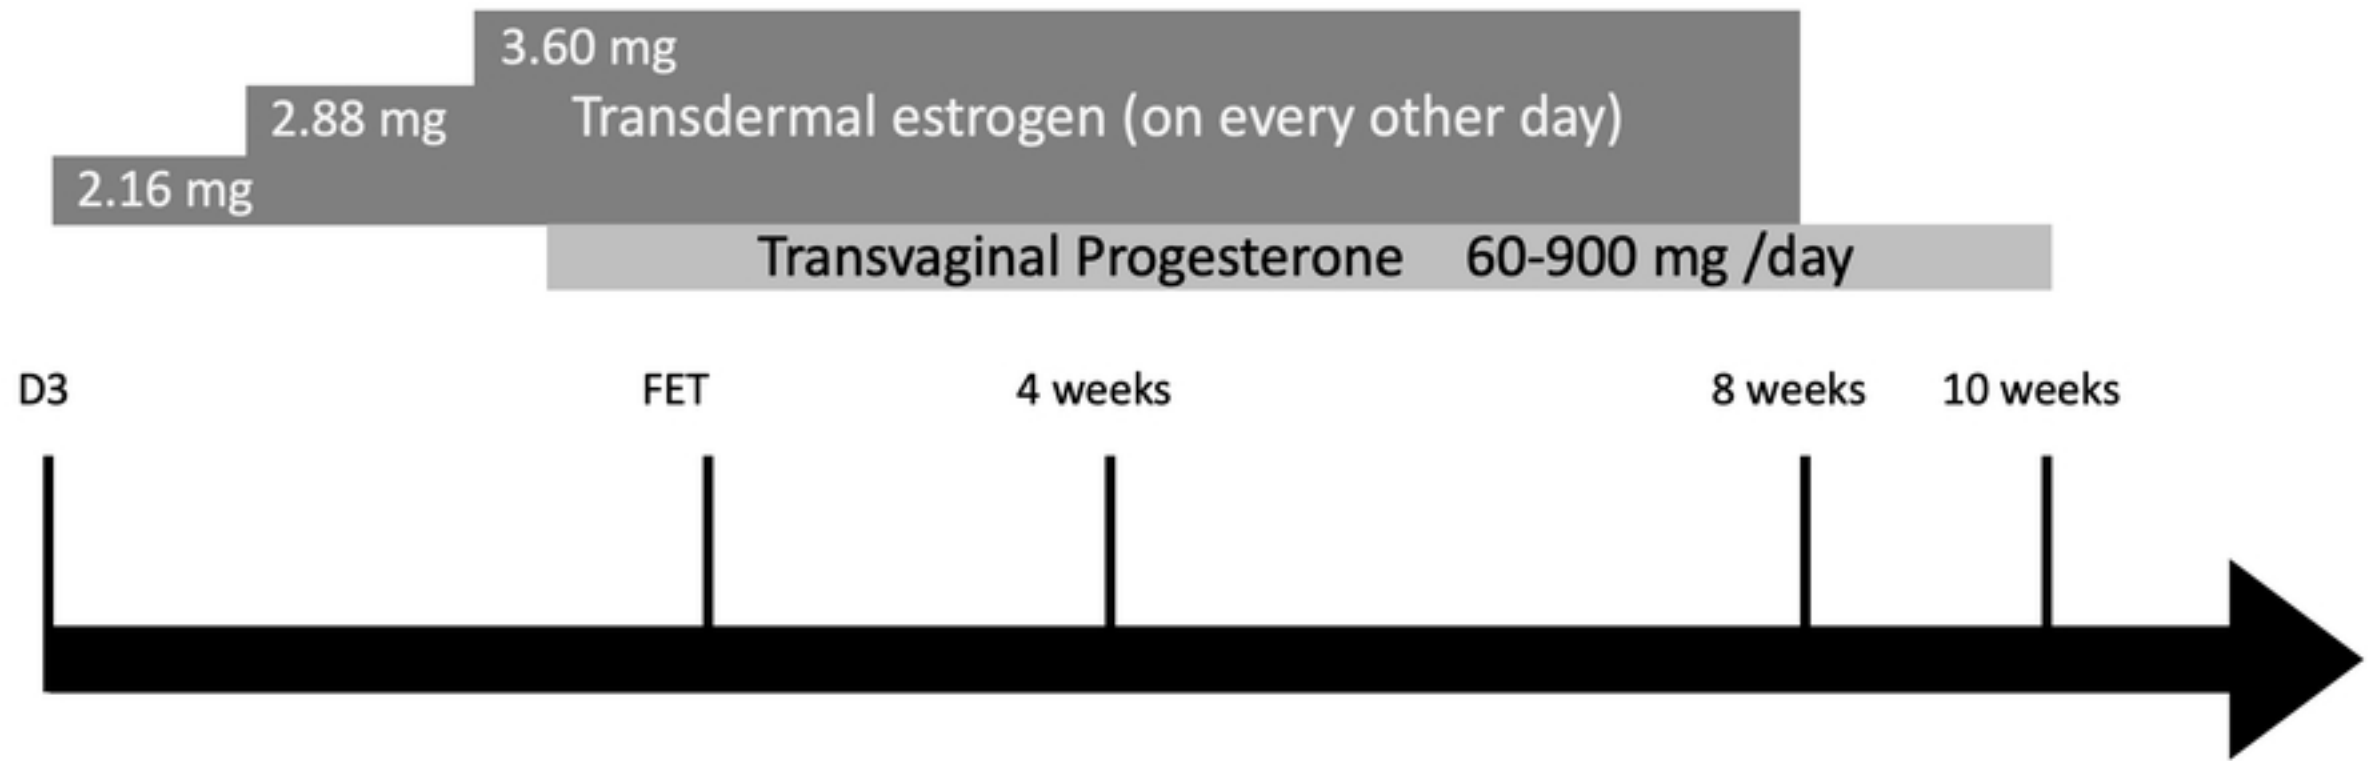

Figure3

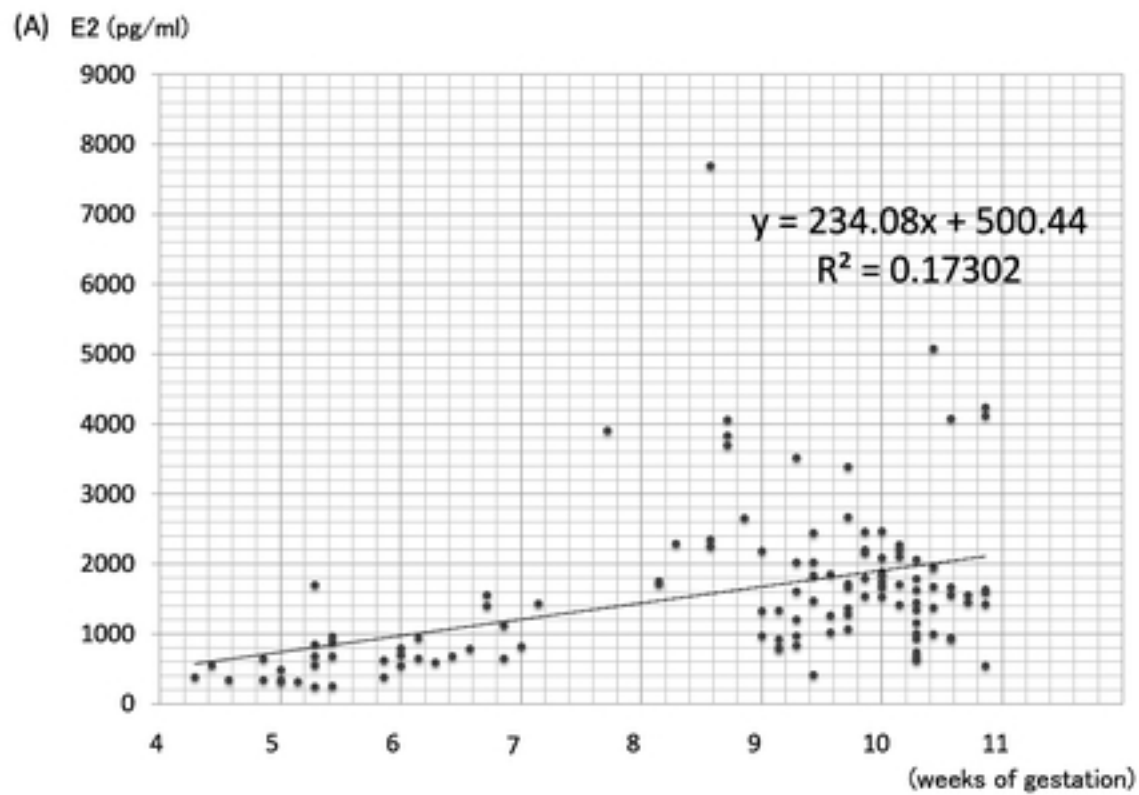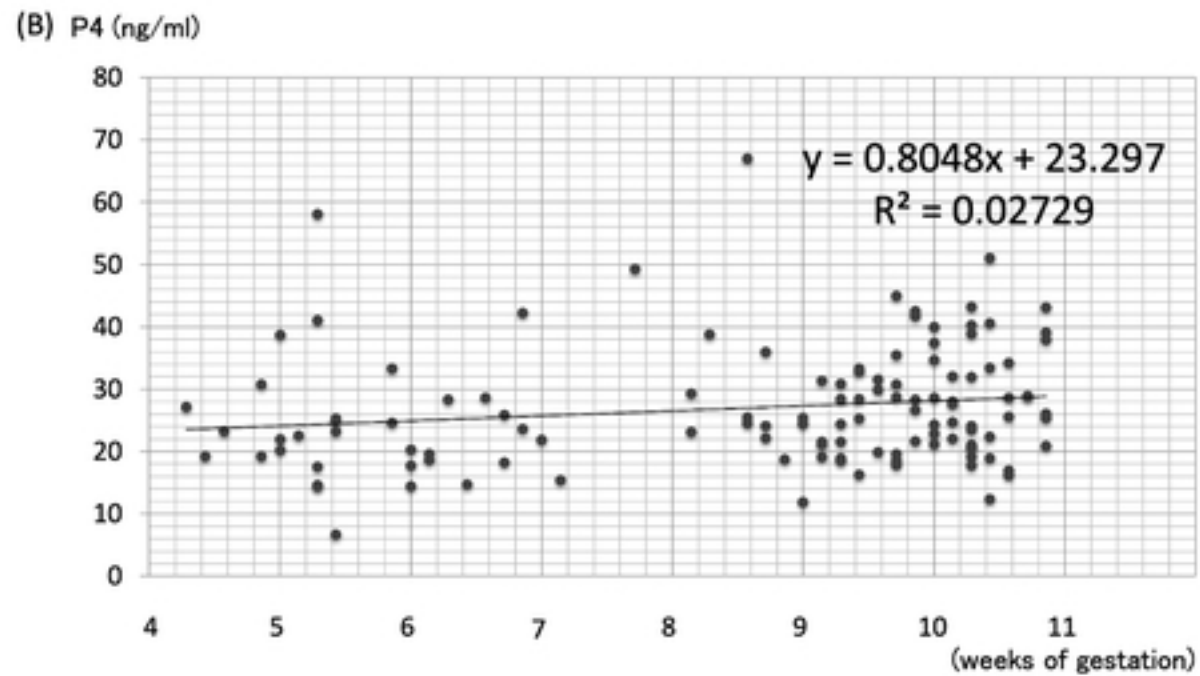

Figure4



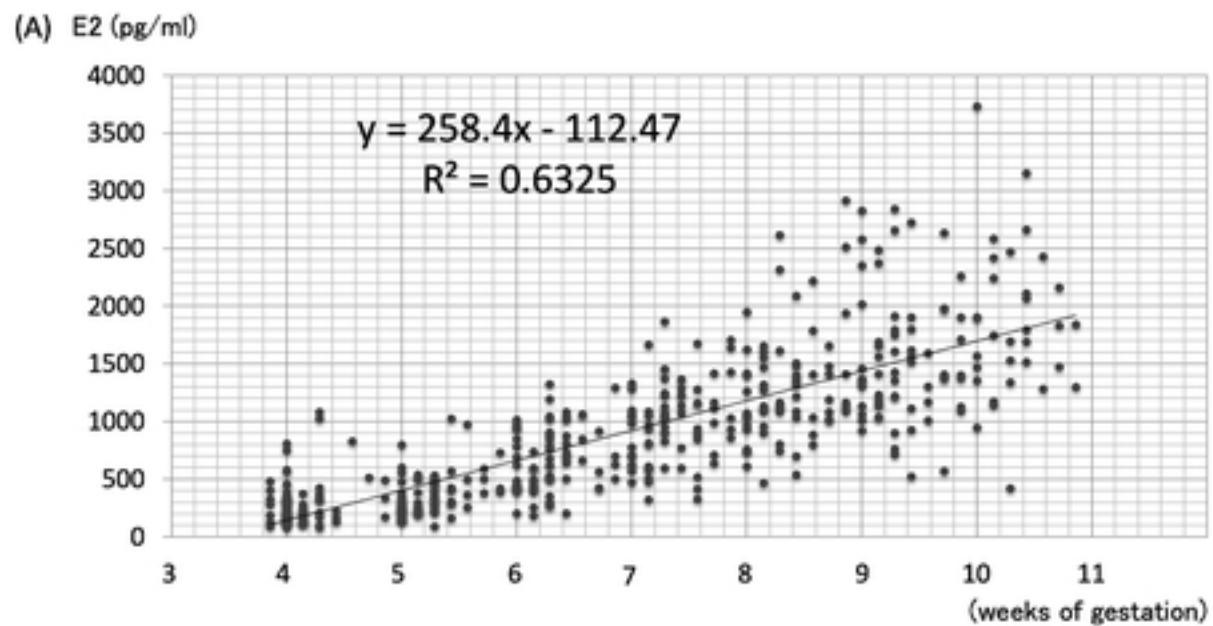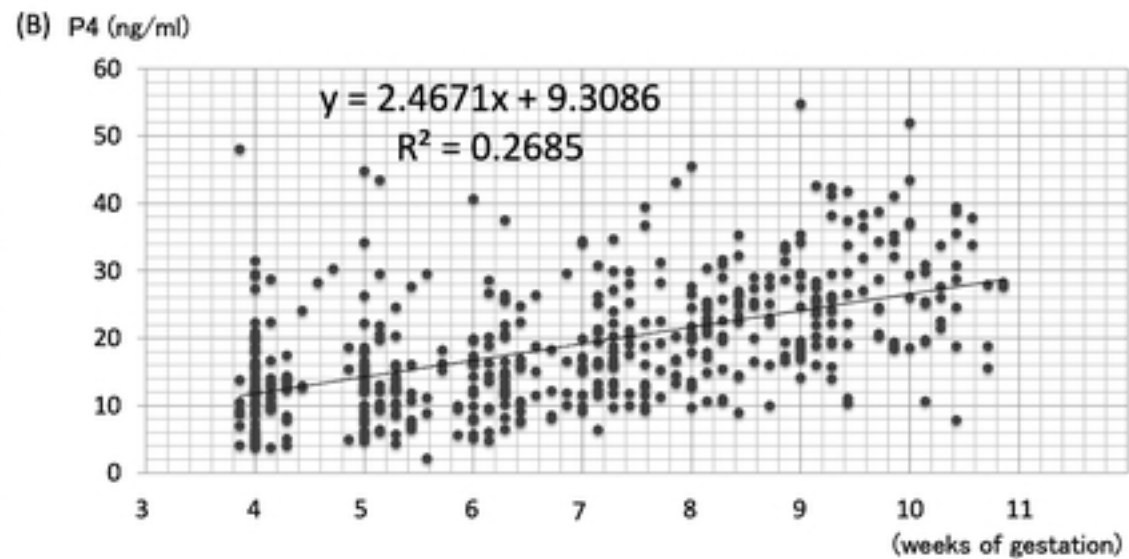

Figure5
